# Supplementary material
Source: Elsevier journal article supplement (https://comptes-rendus.academie-sciences.fr/chimie/article/10.1016/j.crci.2014.01.017/file/attach/mmc1.pdf)
Supplement: mmc1 [file mmc1.pdf]

## **-Supplementary data-**

**Étude structurale des analogues du bleu de Prusse par spectroscopie infra-rouge**

**Application of the infra-red spectroscopy to the structural study of Prussian blue analogues**

Julien Lejeune<sup>a,\*</sup>, Jean-Blaise Brubach<sup>b</sup>, Pascale Roy<sup>a,b</sup>, Anne Bleuzen<sup>a,\*</sup>

<sup>a</sup> *Institut de Chimie Moléculaire et des Matériaux d'Orsay, UMR CNRS 8182, Université Paris-Sud, 15  
rue Georges Clémenceau, F-91405 Orsay Cedex, France*

<sup>b</sup> *Synchrotron SOLEIL, l'Orme des merisiers Saint-Aubin, BP 48, F-91192 Gif-sur-Yvette Cedex, France*

## -Supplementary data-

### A1. Evolution of the different contributions to the $\nu\{\text{O-H}\}$ bands as a function of the chemical composition of $\text{A}_x\text{CoFe}$ PBAs

The IR spectrum of PBAs exhibits very sharp bands in the  $3550\text{-}3700\text{ cm}^{-1}$  spectral range, associated with water molecules that are not involved in a hydrogen-bonded network. The number of these sharp bands may vary depending on the nature of the PBA (Fig. A1).

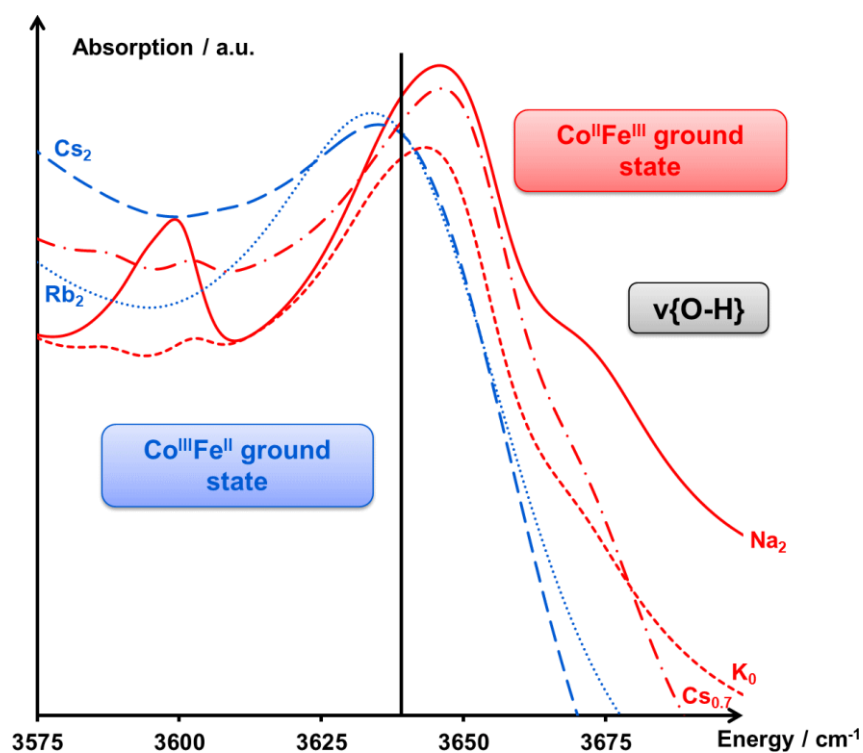

**Fig. A1.** IR spectrum of several  $\text{A}_x\text{CoFe}$  PBAs in the spectral range associated with the  $\nu\{\text{O-H}\}$  vibration band of water molecules bound to the cobalt cations at the  $\text{Fe}(\text{CN})_6$  vacancies, at  $T = 300\text{ K}$ . Spectra associated with  $\text{A}_x\text{CoFe}$  PBAs exhibiting a  $\text{Co}^{\text{II}}\text{Fe}^{\text{III}}$  (resp.  $\text{Co}^{\text{III}}\text{Fe}^{\text{II}}$ ) ground state at  $T = 300\text{ K}$  are plotted in red (resp. blue). Legend:  $\text{K}_0\text{CoFe}$  (---),  $\text{Cs}_{0.7}\text{CoFe}$  (-·-·-),  $\text{Na}_2\text{CoFe}$  (—),  $\text{Rb}_2\text{CoFe}$  (···),  $\text{Cs}_2\text{CoFe}$  (— — —).

The position in term of energy of the main band, associated with the  $\nu\{\text{O-H}\}$  vibration of water molecules bound to the cobalt cations at the  $\text{Fe}(\text{CN})_6$  vacancies, mostly depends on the electronic state of the system (and, therefore, of the oxidation state of the cobalt cations): in the

## **-Supplementary data-**

Co<sup>II</sup>Fe<sup>III</sup> electronic state, the  $\nu\{\text{O-H}\}$  vibration band associated with water molecules bound to the Co<sup>II</sup> cations is located above  $3638\text{ cm}^{-1}$ ; in the Co<sup>III</sup>Fe<sup>II</sup> electronic state, the  $\nu\{\text{O-H}\}$  vibration band associated with water molecules bound to the Co<sup>III</sup> cations is located below  $3638\text{ cm}^{-1}$ . The nature and the amount of alkali cations inserted in the structure may modulate the position in terms of energy of this band.
